# Supplementary material
Source: Springer Nature journal article supplement (https://www.springermedizin.de/resource/supplementary/12936_2011_1863_MOESM2_ESM.pdf/9541942)
Supplement: MOESM2 [file 9541942]

Parasite density (/μL) Input from schizont rupture

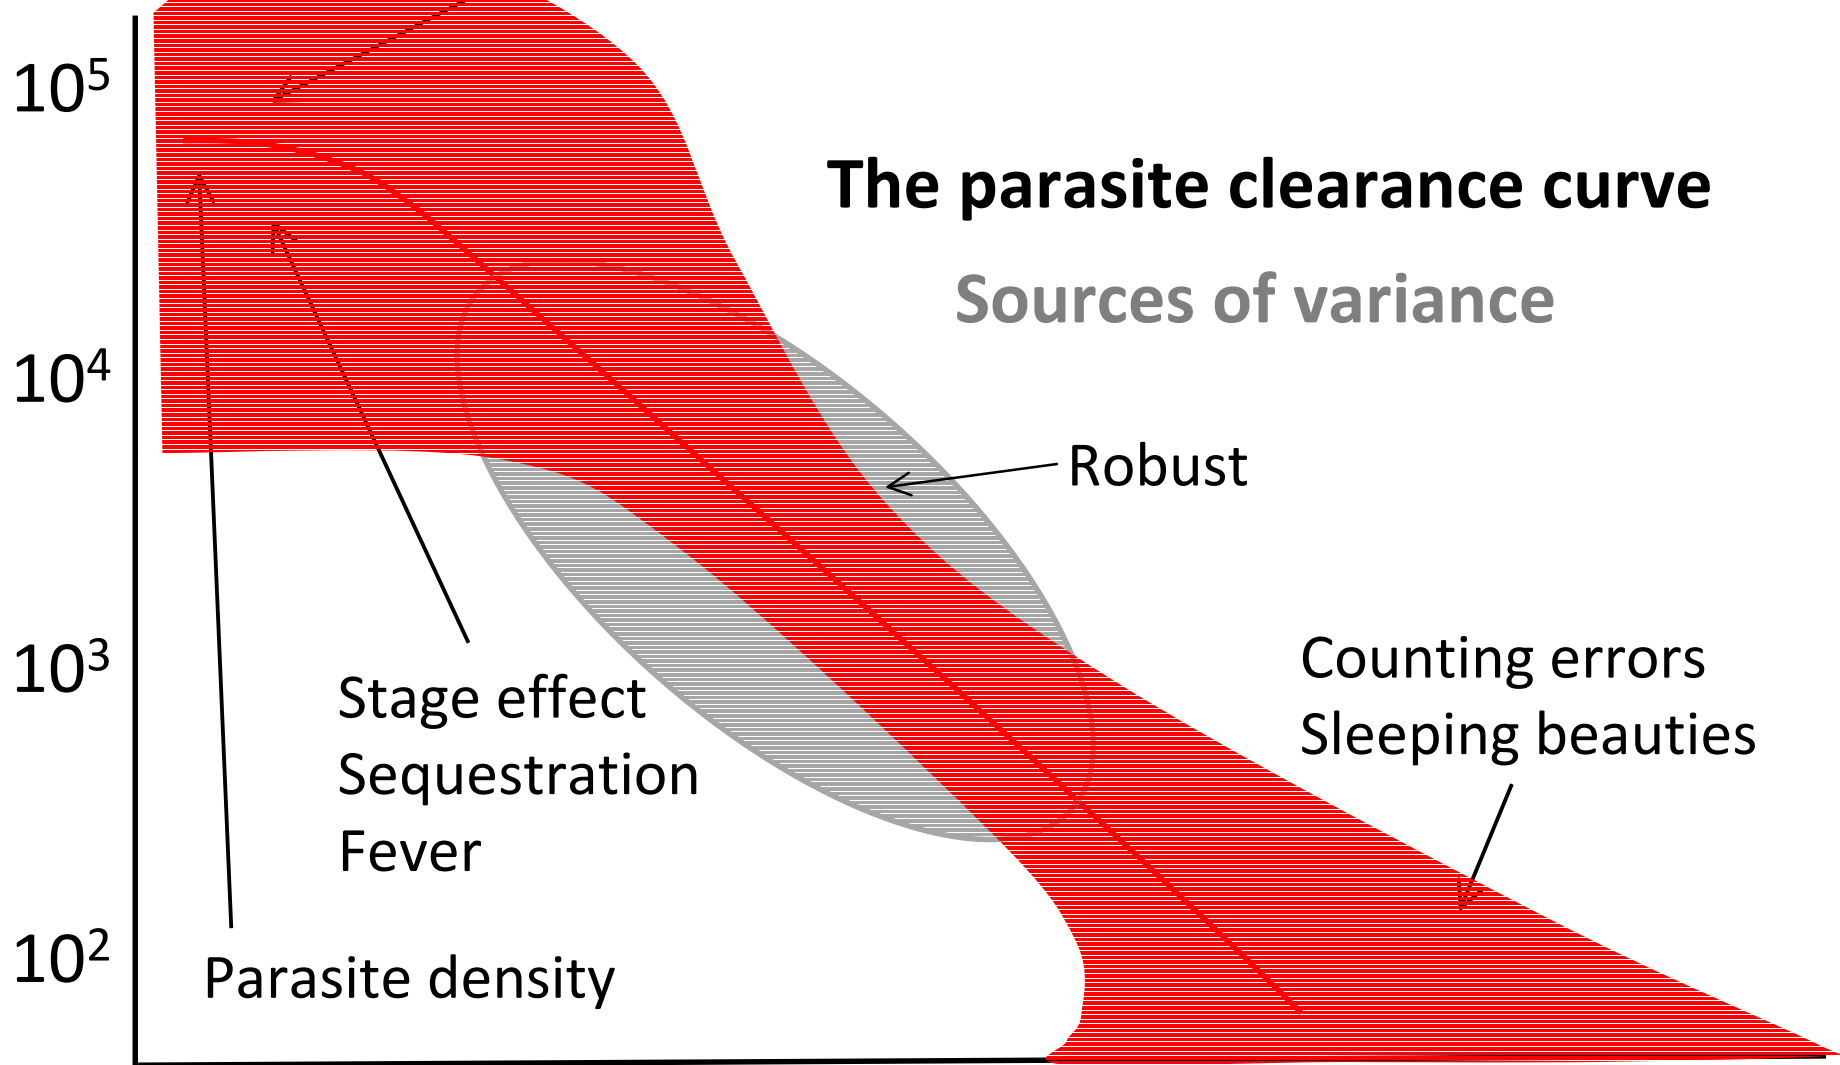

### The parasite clearance curve

Sources of variance

Robust

Stage effect  
Sequestration  
Fever

Counting errors  
Sleeping beauties

Parasite density

Time
